# Supplementary material
Source: PubMed Central journal article supplement (PMC9931625)
Supplement: NIHMS1838658-supplement-supinfo.pdf [file NIHMS1838658-supplement-supinfo.pdf]

**Fig. S1- Predictive models of tumor metformin concentration.** Regression models for tumor metformin concentration as a function of 1) dose, 2) dose + plasma concentration, or 3) dose + plasma concentration + and whole blood concentration ( $R^2$ =coefficient of determination). The average value from replicate measurements for each specimen was used. The predictor as a linear function of the variables is listed below each plot. Regression lines (thick) are plotted  $\pm$  standard error of prediction by regression (thin).

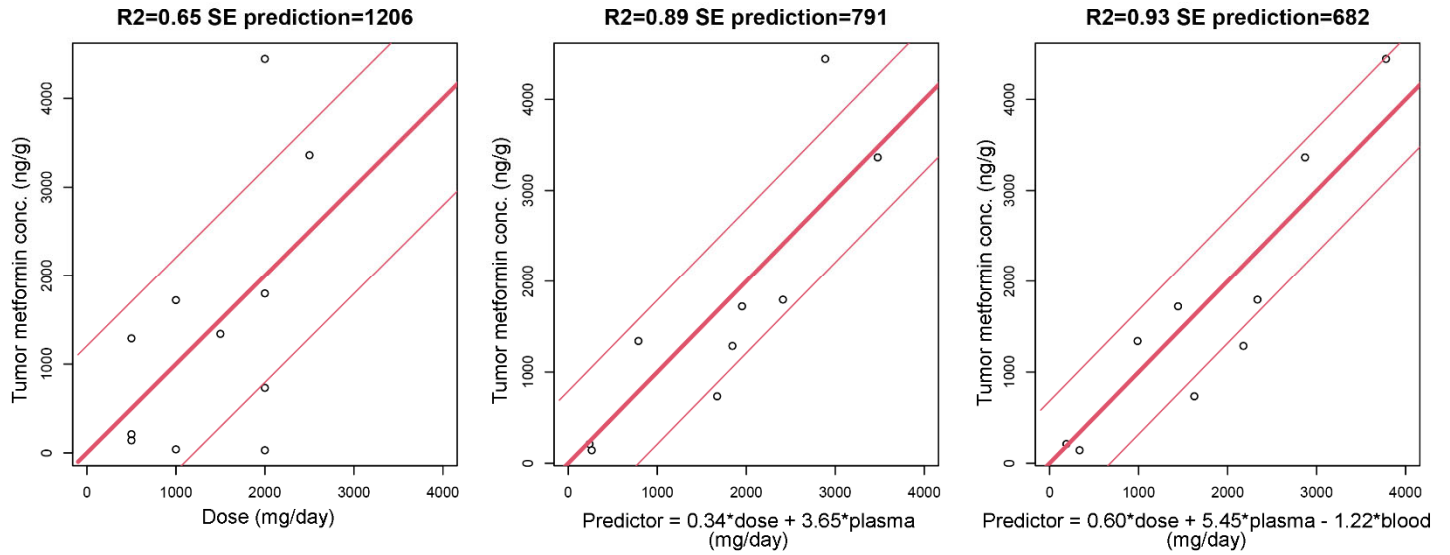

**Fig. S2- Pairwise correlation plots of metformin concentrations in tissue.** Concentrations of metformin in plasma, blood, adipose tissue, lung tissue, and tumor tissue were compared pairwise by subject. Data are plotted as average of replicates  $\pm$  standard deviation for each specimen. Regression lines (thick) were plotted  $\pm$  standard error of prediction by regression (thin). p-values were calculated by comparing slopes to null hypothesis.

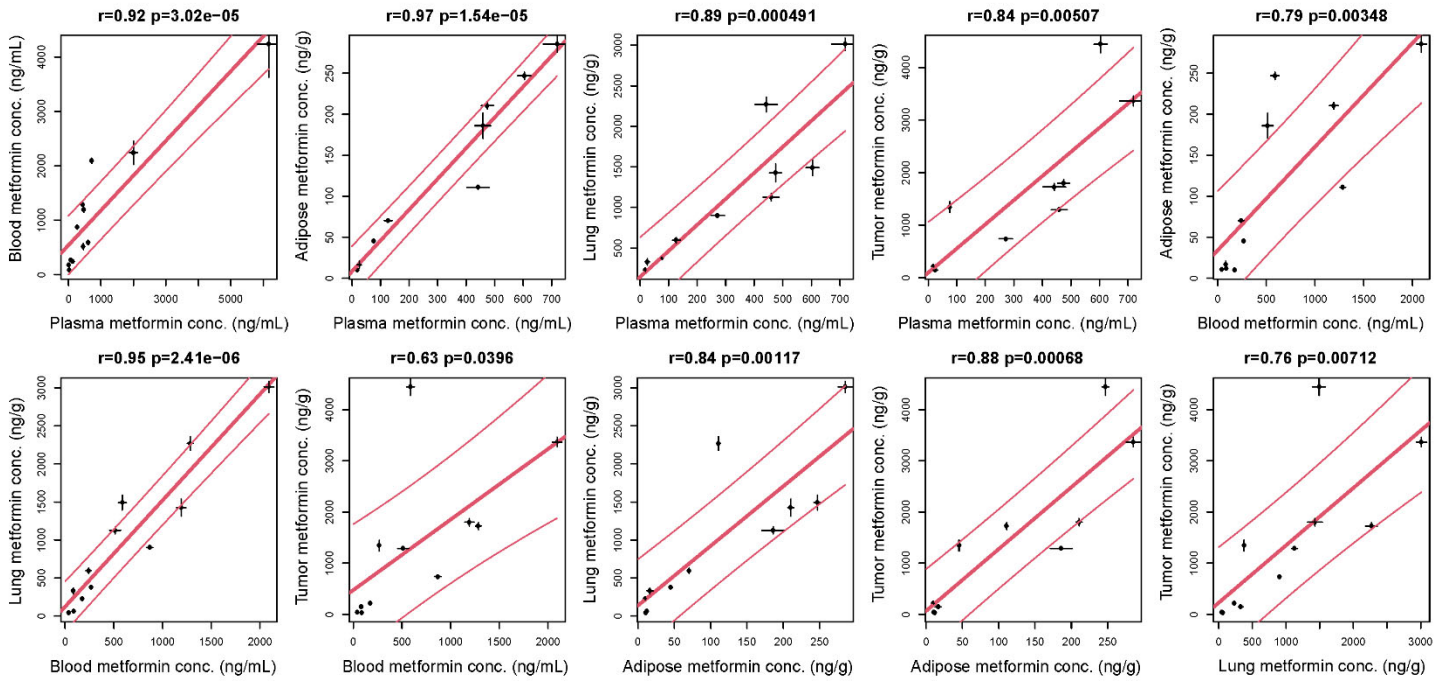

**Fig. S3- Adjustment for dose formulation and frequency does not significantly alter model prediction of metformin concentration by dose.** A linear mixed-effects model was applied accounting for inter-subject variation to predict tissue metformin concentration compared to daily dose with adjustment for dose formulation (SR or ER) and frequency (QD or BID). Adjusted regression lines (thick) and 95% confidence intervals (thin) are shown for each tissue type. Unadjusted regression lines from Fig. 2 (dotted) and slopes (“Dose slope”) are included for visual comparison. p-values comparing the two regression lines are indicated. Testing included all replicates with metformin concentrations  $\geq$ LLOQ.

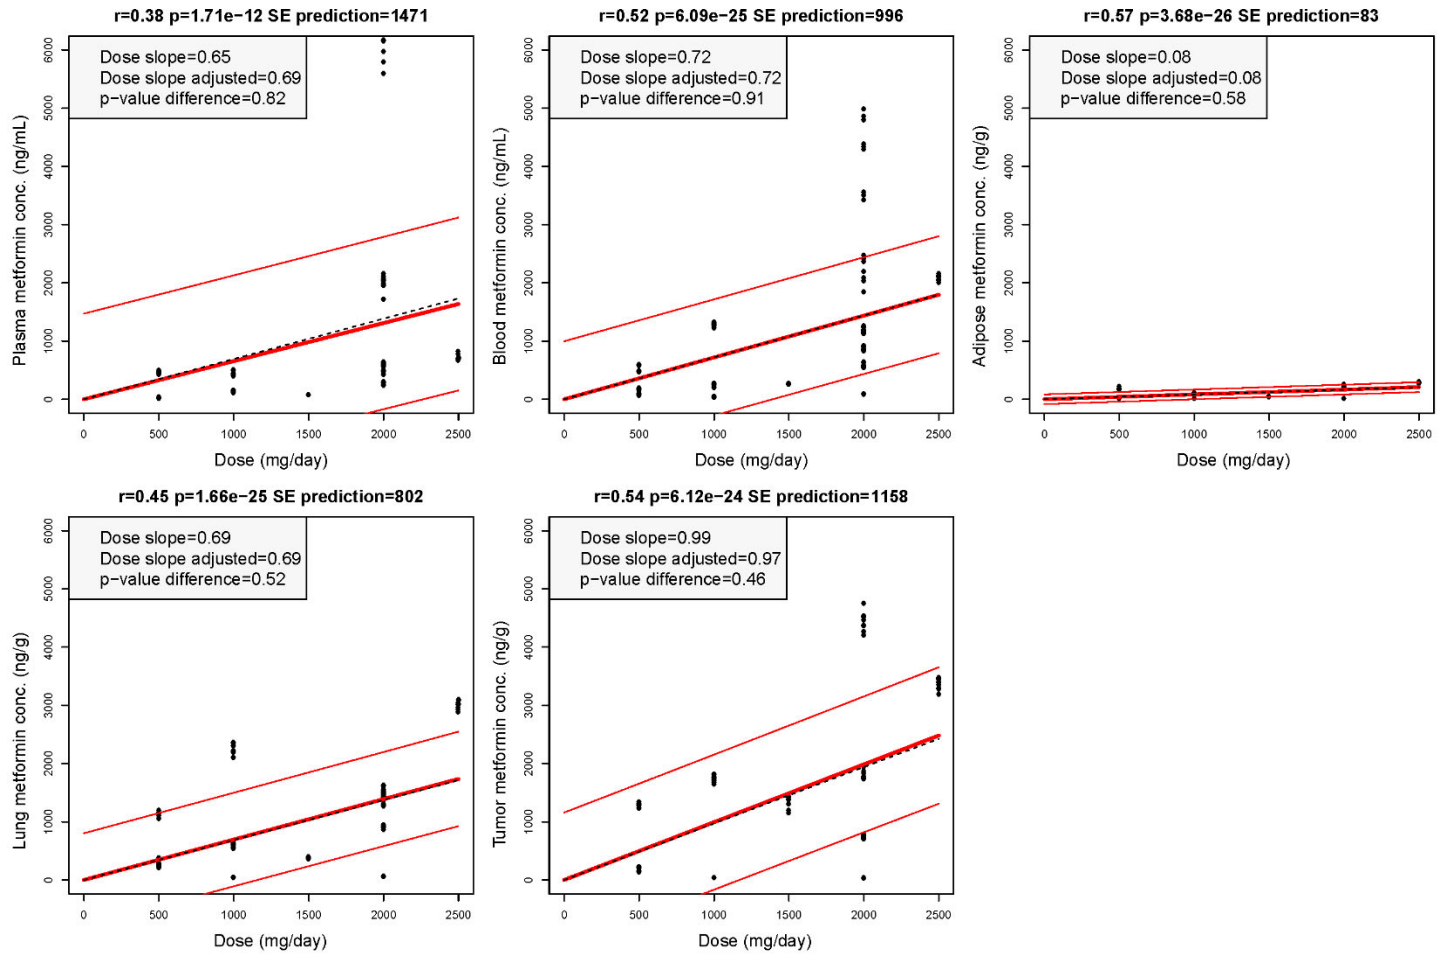

**Fig S4- Pairwise comparison of metformin concentrations between tissue compartments.** Slopes of lines from Fig. 2 (dose vs. concentration within each tissue compartment) were compared in a pairwise manner. Multiple comparison-adjusted p-values are shown. Cells are colored with white-to-red gradient based on decreasing p-value.

|         | Plasma  | Blood   | Adipose | Lung    | Tumor   |
|---------|---------|---------|---------|---------|---------|
| Plasma  |         | 0.52452 | <0.0001 | 0.68307 | 0.00241 |
| Blood   | 0.52452 |         | <0.0001 | 0.74936 | 0.00295 |
| Adipose | <0.0001 | <0.0001 |         | <0.0001 | <0.0001 |
| Lung    | 0.68307 | 0.74936 | <0.0001 |         | 0.00085 |
| Tumor   | 0.00241 | 0.00295 | <0.0001 | 0.00085 |         |
